# Supplementary material for: Development of Pickering water-in-oil emulsions using a dual stabilization of candelilla wax and acylated EGCG derivatives to enhance the survival of probiotics (Lactobacillus plantarum) powder
Source: Royal Society of Chemistry journal article supplement (doi:10.1039/d4fo01342e), 2024-01-01
Supplement: d4fo01342e1.pdf [file d4fo01342e1.pdf]

**Development of Pickering water-in-oil emulsions using a dual stabilization of candelilla wax and acylated EGCG derivatives to enhance the survival of probiotics (*Lactobacillus plantarum*) powder**

Zhaojuan Shi <sup>a,b</sup>, Jun Wu <sup>a,b</sup>, Xingting Wang <sup>a,b</sup>, Tongqiao Nie <sup>a,b</sup>, Qingmei Zeng <sup>a,b</sup>,  
Chuanxun Yuan <sup>a,b,\*</sup>, Risheng Jin <sup>a,b,\*</sup>

*<sup>a</sup>School of Food and Biological Engineering, Hefei University of Technology, Hefei, 230009, P. R. China*

*<sup>b</sup>Engineering Research Center of Agricultural Product Biochemicals, Ministry of Education, Hefei 230009, P. R. China*

\*Corresponding author: Chuanxun Yuan, E-mail: [ycx608@sohu.com](mailto:ycx608@sohu.com), Fax: 86-551-62901285; Risheng Jin, E-mail: [jinrisheng@hfut.edu.cn](mailto:jinrisheng@hfut.edu.cn), Fax: 86-551-62901285

## Supplementary Method

### Cytotoxicity assay

The cytotoxicity of acylated EGCG derivatives was determined using mouse embryonic fibroblasts (NIH-3T3) by Cell Counting Kit-8 (CCK-8). Cell suspensions (100  $\mu\text{L}$ /well) were inoculated in 96-well plates and placed in an incubator for 24 h of pre-culture (37°C, 5%  $\text{CO}_2$ ). Acylated EGCG derivatives were dissolved in DMSO and diluted with a culture medium. 10  $\mu\text{L}$  of samples with different concentrations (0, 10, 20, 40, and 80  $\mu\text{g}/\text{mL}$ ) were added to the culture plate and incubated for 24 h (37°C, 5%  $\text{CO}_2$ ). 10  $\mu\text{L}$  of CCK-8 solution was added to each well, and the plates were incubated in an incubator for 4 h (37°C, 5%  $\text{CO}_2$ ). Optical density (OD) was measured using a microplate reader (H1, Boten Instrument Co., Ltd., Winooski, VT, USA) at 450 nm. Relative cell viability was obtained using the following equation: relative cell viability(%) =  $[\text{OD}(\text{experimental}) - \text{OD}(\text{blank})]/[\text{OD}(\text{control}) - \text{OD}(\text{blank})] \times 100$ .

## Supplementary Results

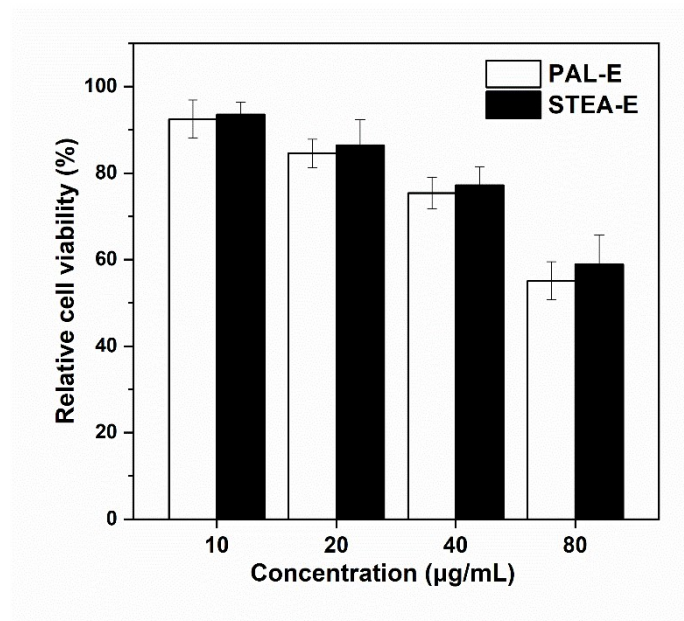

**Figure S1.** Cytotoxicity of acylated EGCG derivatives.

PAL-E, epigallocatechin gallate palmitate, STEA-E, epigallocatechin gallate stearate.

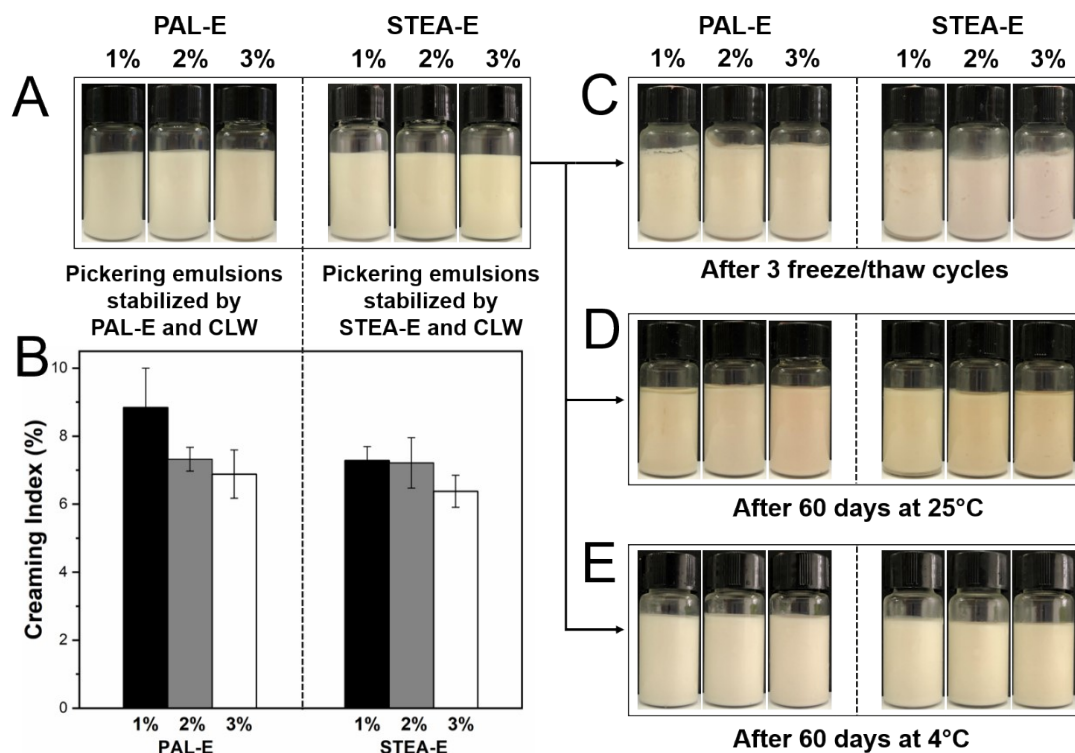

**Figure S2.** Physical stability of water-in-oil Pickering emulsions co-stabilized by 1-3% m/v acylated epigallocatechin gallate derivatives and 2% m/v candelilla wax at 80% oil phase volume fraction. (A) Appearance of freshly prepared emulsions; (B) Creaming index of emulsions after centrifugation; (C) Appearance of emulsions after three freeze-thaw cycles; (D) Appearance of emulsions after 60 days of storage at 25°C; (E) Appearance of emulsions after 60 days of storage at 4°C.

PAL-E, epigallocatechin gallate palmitate, STEA-E, epigallocatechin gallate stearate, CLW, candelilla wax.

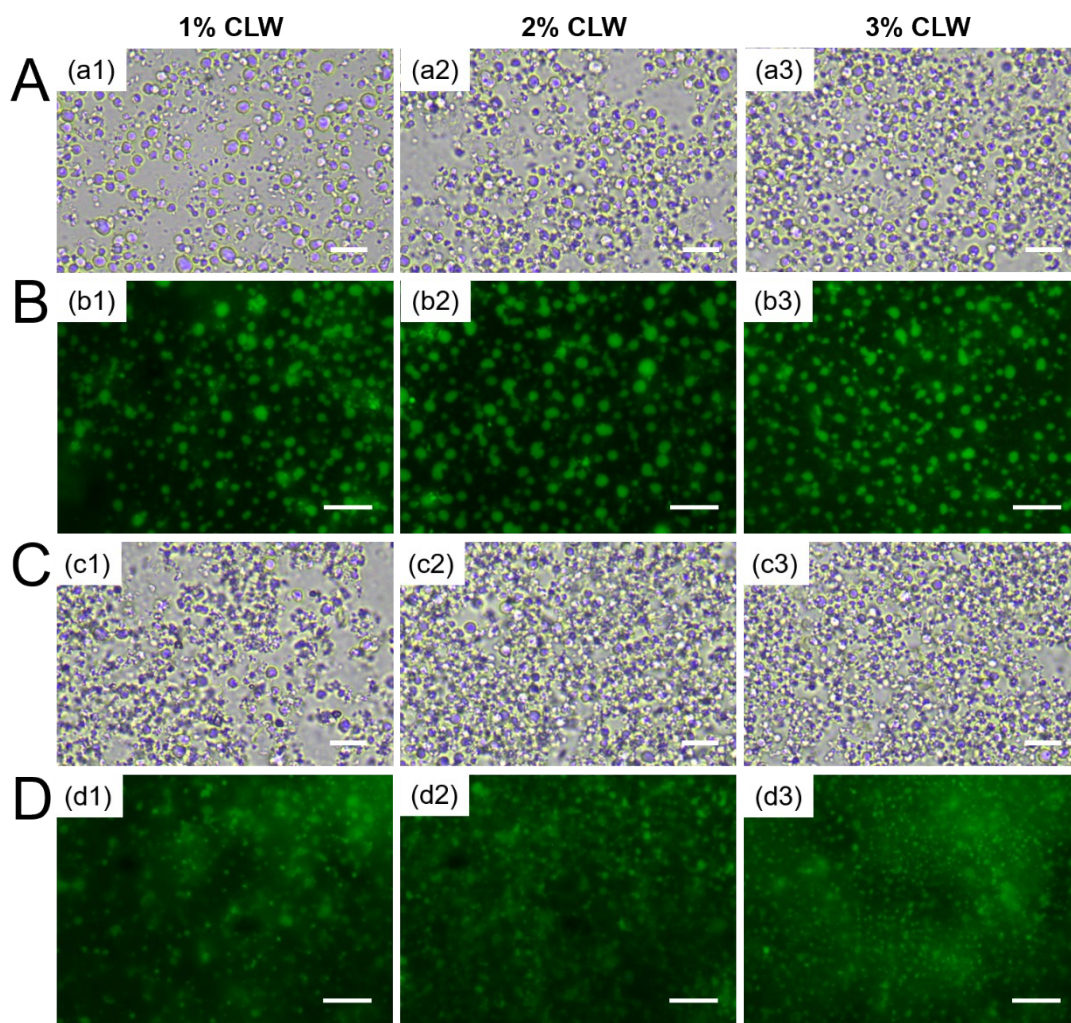

**Figure S3.** Microstructure of water-in-oil Pickering emulsions co-stabilized by 2% m/v acylated epigallocatechin gallate derivatives and 1-3% m/v candelilla wax at 80% oil phase volume fraction (scale bar: 10  $\mu$ m). (A) Optical microscopy of epigallocatechin gallate palmitate and candelilla wax co-stabilized emulsions: a1, 1% m/v candelilla wax, a2, 2% m/v candelilla wax, and a3, 3% m/v candelilla wax; (B) Fluorescence microscopy of epigallocatechin gallate palmitate and candelilla wax co-stabilized emulsions: c1, 1% m/v candelilla wax, c2, 2% m/v candelilla wax, and c3, 3% m/v candelilla wax; (C) Optical microscopy of epigallocatechin gallate stearate and candelilla wax co-stabilized emulsions: d1, 1% m/v candelilla wax, d2, 2% m/v candelilla wax, and d3, 3% m/v candelilla wax; (D) Fluorescence microscopy of

epigallocatechin gallate stearate and candelilla wax co-stabilized emulsions: f1, 1% m/v

candelilla wax, f2, 2% m/v candelilla wax, and f3, 3% m/v candelilla wax.

CLW, candelilla wax.

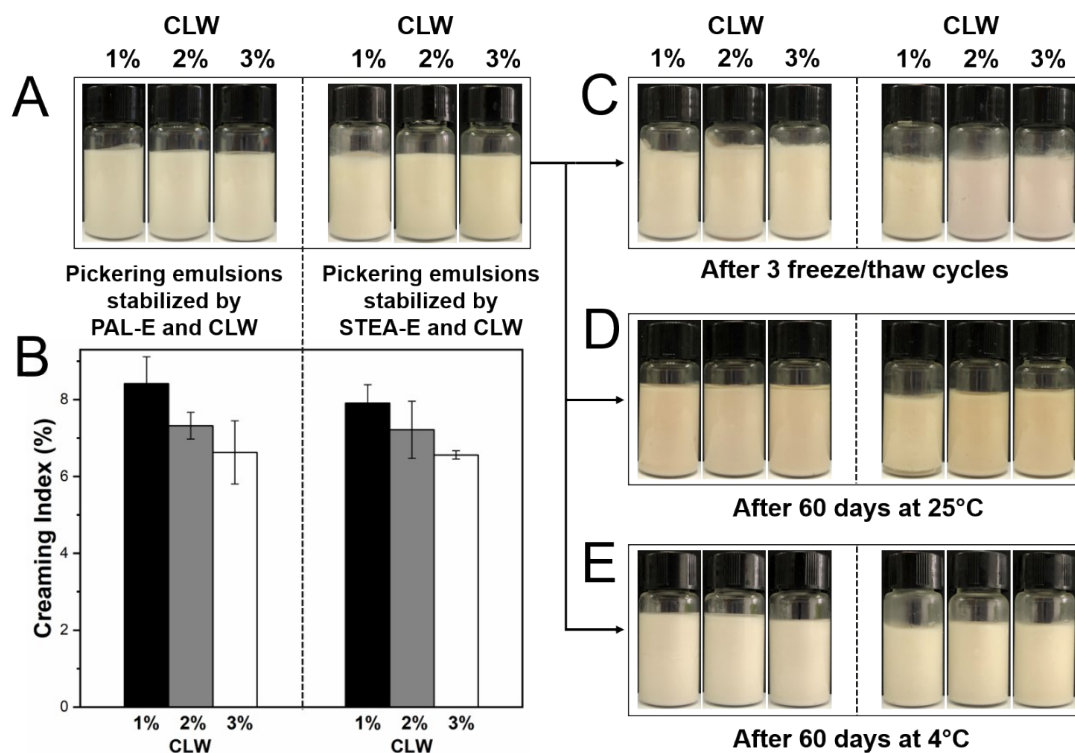

**Figure S4.** Physical stability of water-in-oil Pickering emulsions co-stabilized by 2% m/v acylated epigallocatechin gallate derivatives and 1-3% m/v candelilla wax at 80% oil phase volume fraction. (A) Appearance of freshly prepared emulsions; (B) Creaming index of emulsions after centrifugation; (C) Appearance of emulsions after three freeze-thaw cycles; (D) Appearance of emulsions after 60 days of storage at 25°C; (E) Appearance of emulsions after 60 days of storage at 4°C.

PAL-E, epigallocatechin gallate palmitate, STEA-E, epigallocatechin gallate stearate, CLW, candelilla wax.
